# Supplementary material
Source: PubMed Central journal article supplement (PMC1857268)
Supplement: JCI0730866sd.pdf [file JCI0730866sd.pdf]

## Supplementary Figure 1

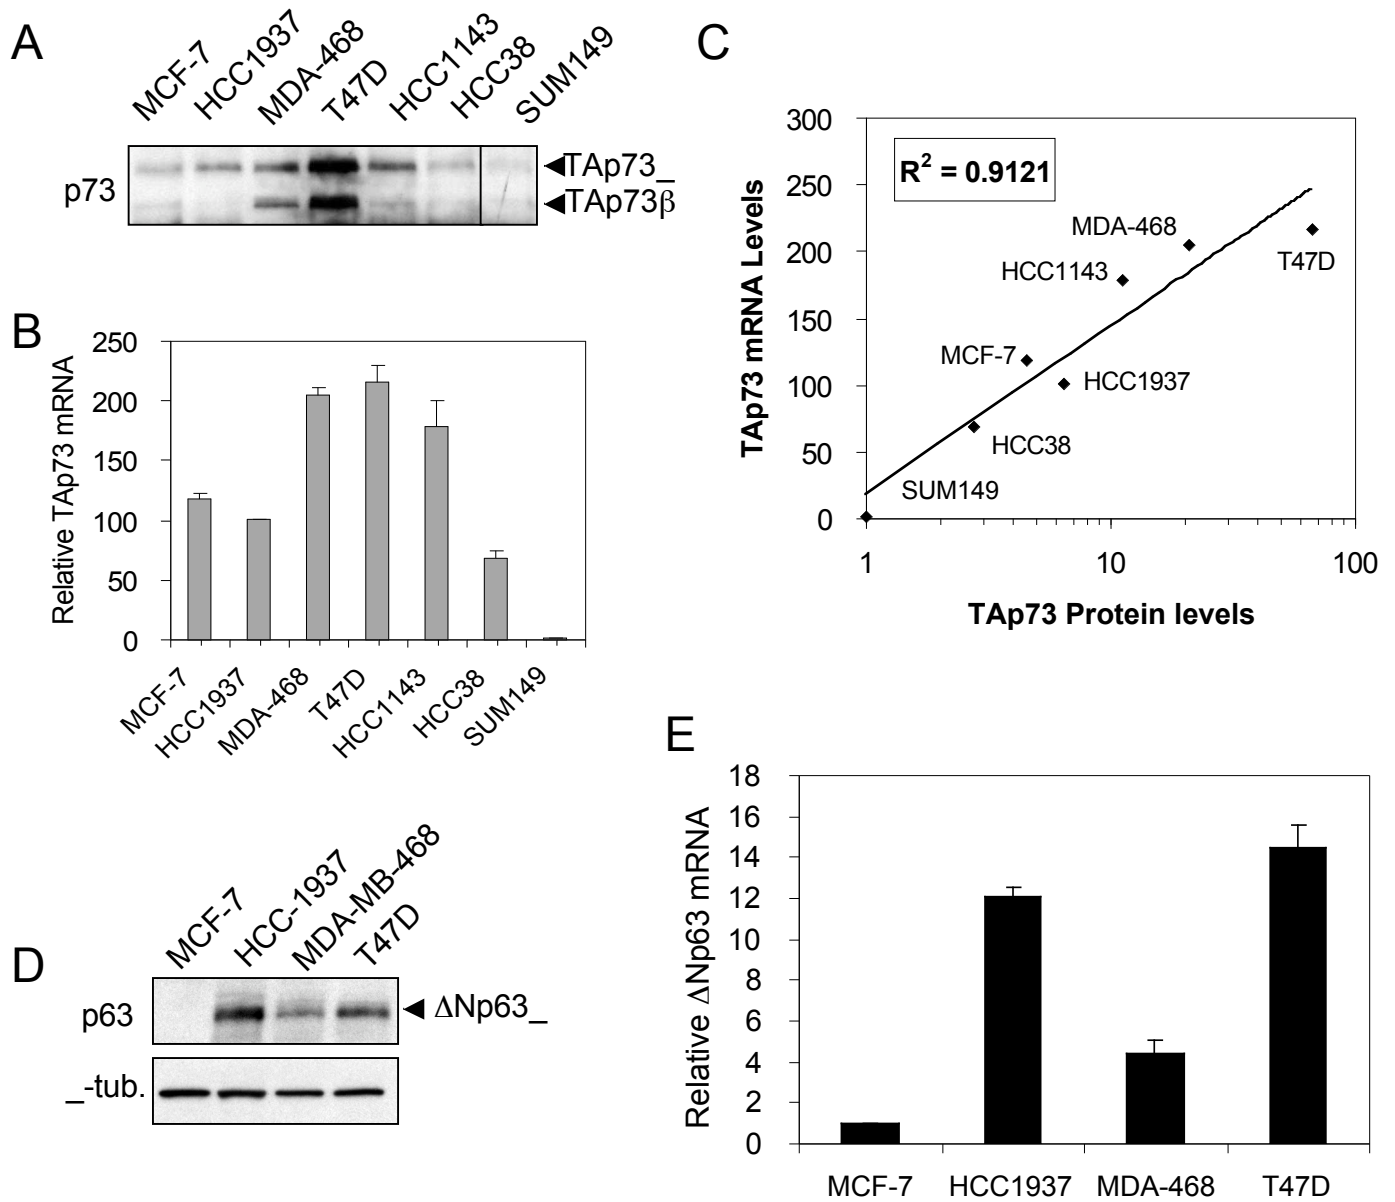

## Supplementary Figure 2

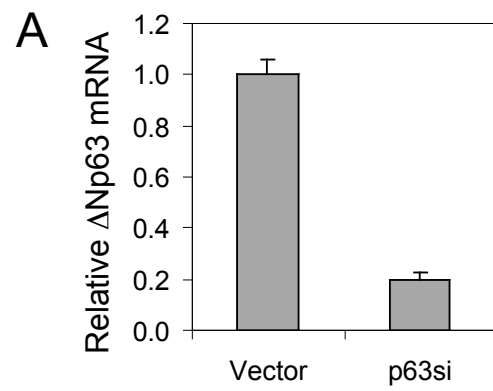

**B** MCF-7

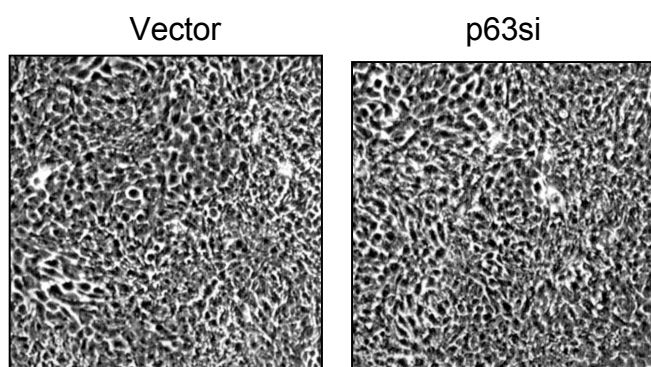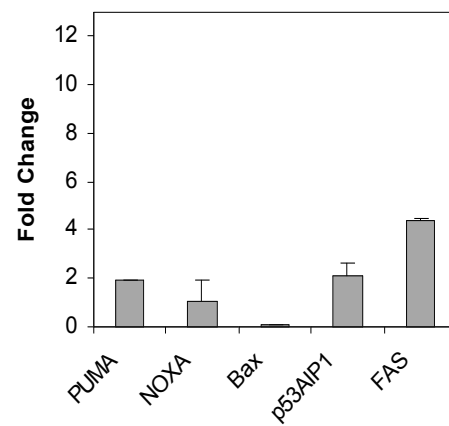

## Supplementary Figure 3

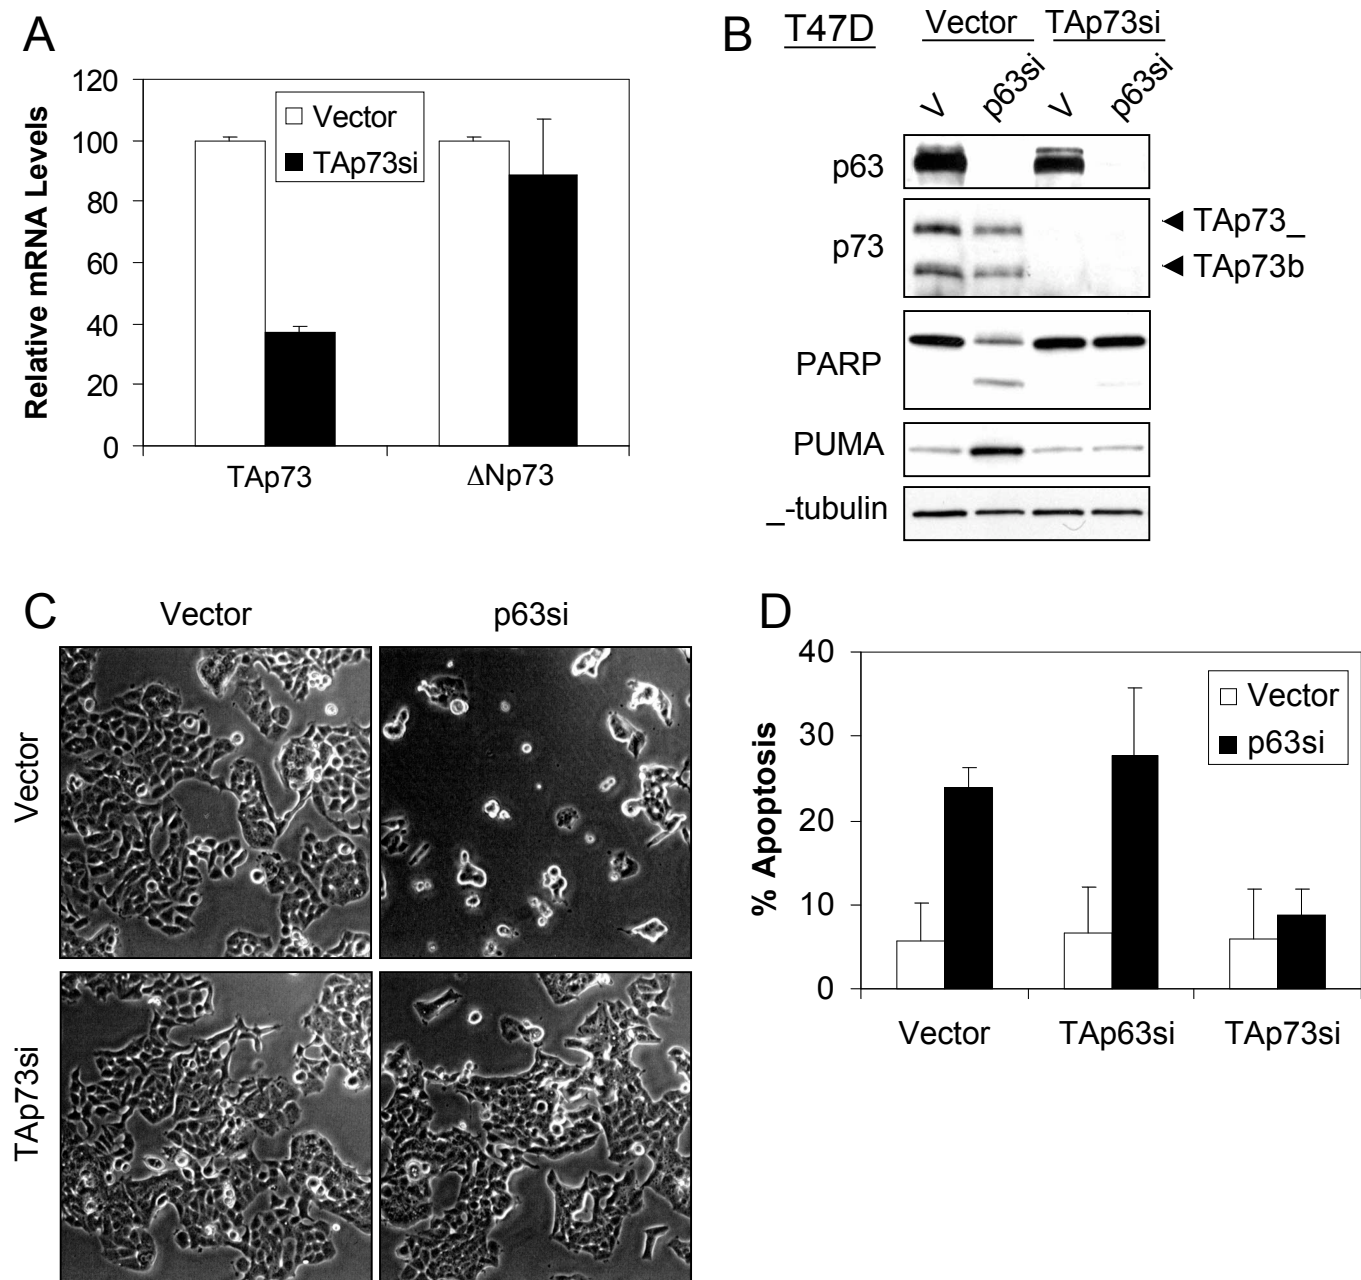

## Supplementary Figure 4

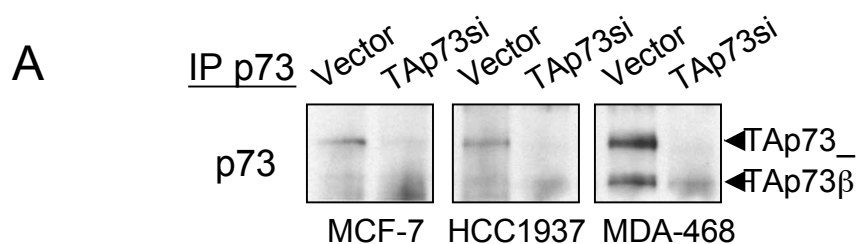

**B**

| Cell Lines        | Cisplatin (uM) | Doxorubicin (nM) | Paclitaxel (nM) |
|-------------------|----------------|------------------|-----------------|
| <b>MCF-7</b>      |                |                  |                 |
| Vector            | 6.00 ± 0.57    | < 10.00          | 0.59 ± 0.04     |
| TAp73si           | 9.22 ± 0.19    | < 10.00          | 0.59 ± 0.06     |
| <b>HCC1937</b>    |                |                  |                 |
| Vector            | 2.80 ± 1.48    | 40.14 ± 10.5     | 0.78 ± 0.08     |
| TAp73si           | 43.75 ± 0.59   | 20.31 ± 9.26     | 0.53 ± 0.50     |
| <b>MDA-MB-468</b> |                |                  |                 |
| Vector            | 1.15 ± 0.40    | 38.43 ± 7.70     | 0.56 ± 0.02     |
| TAp73si           | 12.86 ± 3.10   | 69.28 ± 2.76     | 0.64 ± 0.06     |

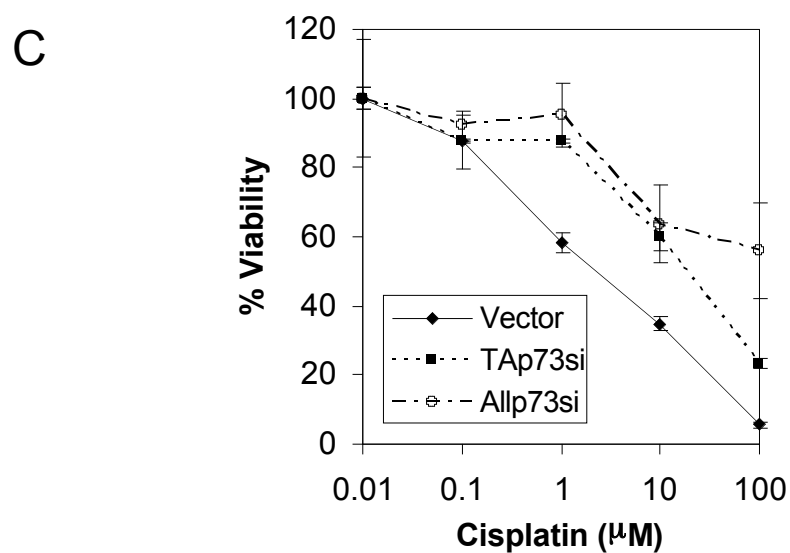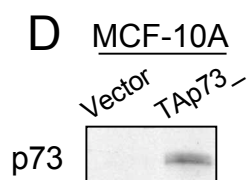

**E**

| MCF-10A | Cisplatin (μM) | Doxorubicin (nM) | Paclitaxel (nM) |
|---------|----------------|------------------|-----------------|
| Vector  | 6.06 ± 0.55    | 57.44 ± 2.73     | 8.23 ± 1.26     |
| TAp73b  | 0.74 ± 0.03    | 73.29 ± 6.88     | 8.12 ± 0.15     |

## Supplementary Figure Legends

**Supplementary Figure 1** Correlation between p73 and p63 mRNA and protein levels in breast cancer cells. **(A)** TAp73 protein level by IP/Immunoblot of 2.5mg protein lysate from the indicated human breast cancer-derived cell lines. Little or no  $\Delta$ Np73 is detected based on transfected isoform size controls and on isoform-specific QRT-PCR (not shown). **(B)** Quantitation of TAp73 by isoform-specific QRT-PCR, normalized to GAPDH. **(C)** Correlation of TAp73 mRNA and protein levels in breast cancer cells. **(D)** Expression of  $\Delta$ Np63 $\alpha$  protein by immunoblot. **(E)** Expression of  $\Delta$ Np63 mRNA by isoform-specific QRT-PCR in the indicated cell lines. Error bars in **B** and **E** show SD for two experiments.

**Supplementary Figure 2** Controls for apoptosis following p63 inhibition by lentiviral shRNA. **(A)** Knockdown of endogenous  $\Delta$ Np63 mRNA by lentiviral p63-directed shRNA (p63si) in HCC-1937. RNA was prepared at 72 hours following lentiviral infection and assayed by isoform-specific QRT-PCR, normalized to GAPDH levels. **(B)** Neither gene induction nor apoptosis is observed in p63-negative MCF-7 cells. Left, photomicrographs (100X) taken at 72 hours post lentiviral shRNA infection. Right, QRT-PCR for the indicated genes. For gene expression graphs, error bars represent SD from two independent experiments performed in duplicate.

**Supplementary Figure 3** Puma induction, PARP cleavage, and apoptosis following p63 knockdown are TAp73-dependent in T47D cells. **(A)** TAp73-directed shRNA targets TAp73 but not  $\Delta$ Np73. Expression of endogenous TAp73 and  $\Delta$ Np73 was assessed by QRT-PCR following lentiviral shRNA infection. Error bars indicate SD from three measurements. **(B)** Cells expressing a TAp73-directed shRNA or control were subsequently infected with a p63-directed lentiviral shRNA and harvested at 72 hours for immunoblot and IP/immunoblot (for p73). **(C)** Photomicrograph (100X) taken 72 hours post lentiviral infection as in **B** show that morphologic features of apoptosis correlate with Puma induction and PARP cleavage. **(D)** Rescue from apoptosis following ablation of TAp73 but not TAp63. Quantitation of apoptosis by Annexin/PI staining of cells

treated as in **B** and harvested 72 hours following p63 knockdown. Error bars show SD for 3 independent experiments.

**Supplementary Figure 4** TAp73 mediates cisplatin sensitivity in breast cancer cells. **(A)** Knockdown of endogenous TAp73 protein by lentiviral shRNA in the indicated cell lines, assessed by IP/immunoblot. **(B)**  $IC_{50}$  values determined by cell viability (MTT) assay 5 days following treatment of control or TAp73-directed shRNA-expressing cells with the indicated agents. Values indicate the mean  $\pm$  SD for 3 independent experiments. **(C)** Knockdown of TAp73 or All p73 isoforms induces cisplatin resistance in breast cancer cells. MTT assay performed as in **B**. **(D)** Stable retroviral expression of TAp73 $\beta$  in MCF-10A cells, assessed by immunoblot. **(E)** TAp73 $\beta$  expression in mammary epithelial cells conveys specific sensitivity to cisplatin.  $IC_{50}$  values determined and expressed as in **B**.

**Supplementary Table 1. p53 Status in Clinical Breast Cancer Samples**

| Sample ID | ER Status | P53 Status | Codon 72 polymorphism | Codon nucleotide             | Codon Amino Acid |
|-----------|-----------|------------|-----------------------|------------------------------|------------------|
| 282       | Positive  | WT         | Pro                   |                              |                  |
| 432       | Positive  | WT         | Pro                   |                              |                  |
| 481       | Positive  | WT         | Pro                   |                              |                  |
| 480       | Positive  | WT         | Pro                   |                              |                  |
| 398       | Positive  | WT         | Pro                   |                              |                  |
| 298       | Positive  | WT         | Pro                   |                              |                  |
| 469       | Positive  | WT         | Pro                   |                              |                  |
| 436       | Positive  | WT         | Pro                   |                              |                  |
| 477       | Positive  | WT         | Pro                   |                              |                  |
| 426       | Positive  | WT         | Pro                   |                              |                  |
| 430       | Positive  | WT         | Pro                   |                              |                  |
| 242       | Positive  | WT         | Pro                   |                              |                  |
| 356       | Positive  | WT         | Pro                   |                              |                  |
| 253       | Positive  | WT         | Pro                   |                              |                  |
| 588       | Negative  | WT         | Unknown               |                              |                  |
| 1274      | Negative  | Mutant     | Pro                   | 151 (G to T)<br>152 (A to G) | Stop<br>E51G     |
| 164       | Negative  | Mutant     | Arg                   | 523 (C to G)                 | R175G            |
| 720       | Negative  | Mutant     | Arg                   | 639 (A to G)                 | R213R            |
| 209       | Negative  | Mutant     | Arg                   | 818 (G to A)                 | R273H            |
| 1196      | Negative  | Mutant     | Pro                   | 730 (G to A)                 | G244S            |
| 465       | Negative  | Mutant     | Arg                   | Del (529-546)                |                  |
| 1322      | Negative  | WT         | Arg                   |                              |                  |
| 1278      | Negative  | WT         | Arg                   |                              |                  |
| 1106      | Negative  | WT         | Arg                   |                              |                  |
| 222       | Negative  | WT         | Unknown               |                              |                  |
| 1321      | Negative  | WT         | Arg                   |                              |                  |
| 715       | Negative  | Mutant     | Pro                   | 577 (C to T)                 | H193Y            |
| 999       | Negative  | WT         | Arg                   |                              |                  |
| 158       | Negative  | WT         | Arg                   |                              |                  |
| 489       | Negative  | Mutant     | Pro                   | 469 (G to T)                 | V157F            |
| 1502      | Negative  | WT         | Arg                   |                              |                  |
| 289       | Negative  | WT         | Pro                   |                              |                  |
| 1325      | Negative  | WT         | Pro                   |                              |                  |
| 1273      | Negative  | Mutant     | Pro                   | 817 (C to T)                 | R273C            |
| 756       | Negative  | WT         | Arg                   |                              |                  |
| 1509      | Negative  | WT         | Pro                   |                              |                  |
| 488       | Negative  | WT         | Pro                   |                              |                  |

Mutational status was determined based on bi-directional sequencing (exon 1-7), and was verified by the presence of nucleotide changes in both strands.

## Supplementary Table 2. Primer sequences for QRT-PCR

| Gene          | Forward primer                  | Reverse primer                  | Product (bp) |
|---------------|---------------------------------|---------------------------------|--------------|
| $\Delta$ Np63 | 5' -GGAAAACAATGCCCAGACTC-3'     | 5' -GTGGAATACGTCCAGGTGGC-3'     | 294          |
| TAp63         | 5' -AAGATGGTGCACAAACAAG-3'      | 5' -AGAGAGCATCGAAGGTGGAG-3'     | 234          |
| TAp73         | 5' -GCACCACGTTTGAGCACCTCT-3'    | 5' -GCAGATTGAACTGGGCCATGA-3'    | 168          |
| $\Delta$ Np73 | 5' -CAAACGGCCCCGCATGTTCCC-3'    | 5' -TTGAACTGGGCCGTGGCGAG-3'     | 232          |
| Bax           | 5' -TGACATGTTTTCTGACGGCAAC-3'   | 5' -GGAGGCTTGAGGAGTCTCAC-3'     | 204          |
| Noxa          | 5' -GAGATGCCTGGGAAGAAGG-3'      | 5' -ACGTGCACCTCCTGAGAAAA-3'     | 228          |
| P53AIP1       | 5' -AGCTCACTCCGAAAGCCTCTGCTC-3' | 5' -GCATCACCGAGAGGTTCTGGTCTC-3' | 280          |
| FAS           | 5' -GGGCATCTGGACCCTCCTAC-3'     | 5' -TCCTTTCACCTGGAGGACAG-3'     | 200          |
| PUMA          | 5' -ACGACCTCAACGCACAGTACGAG-3'  | 5' -AGGAGTCCGCATCTCCGTCA GTG-3' | 345          |
| HER2          | 5' -AGCGGTGTGAAACCTGACC-3'      | 5' -TTGATGAGGATCCCAAAGACC-3'    | 224          |
| B2M           | 5' - AGCTGTGCTCGCGCTACTCT C-3'  | 5' -CACACGGCAGGCATACTCAT C-3'   | 286          |
| GAPDH         | 5' -CACCCAGAAGACTGTGGATGG-3'    | 5' -GTCTACATGGCAACTGTGAGG-3'    | 587          |
